# Supplementary material
Source: Springer Nature journal article supplement (https://www.springermedizin.de/resource/supplementary/13051_2012_244_MOESM1_ESM.pdf/9670232)

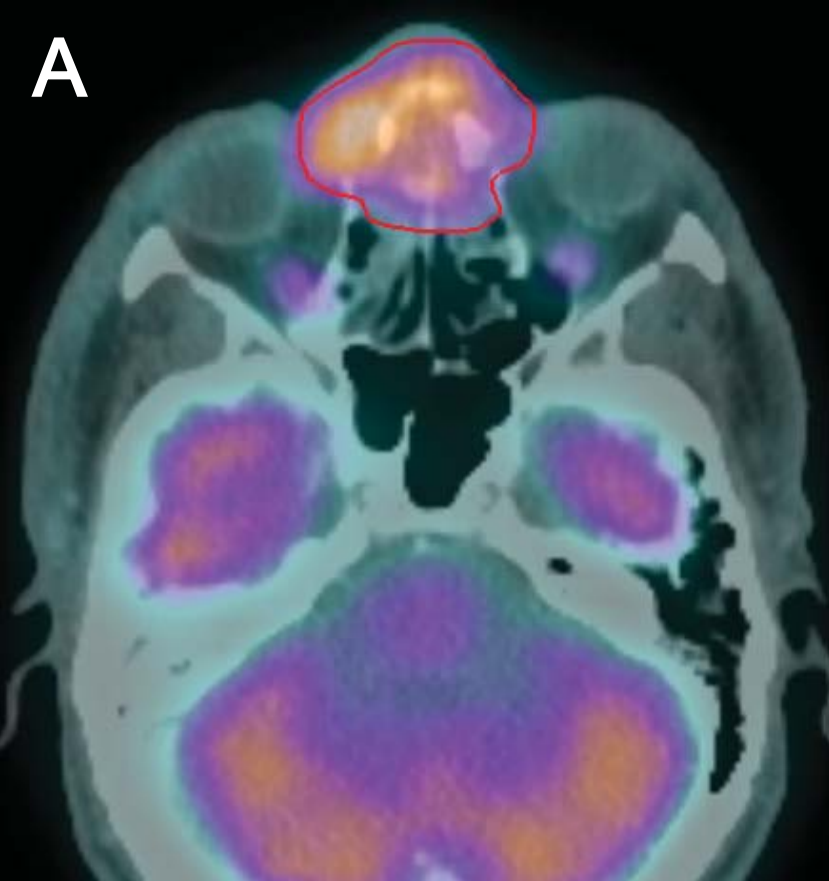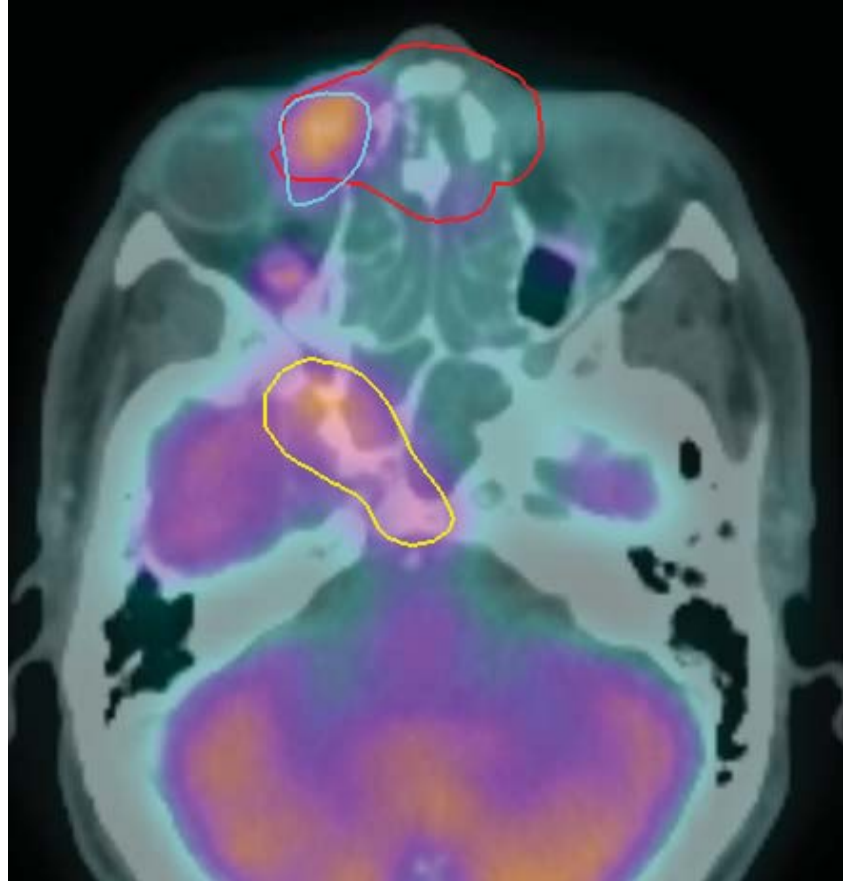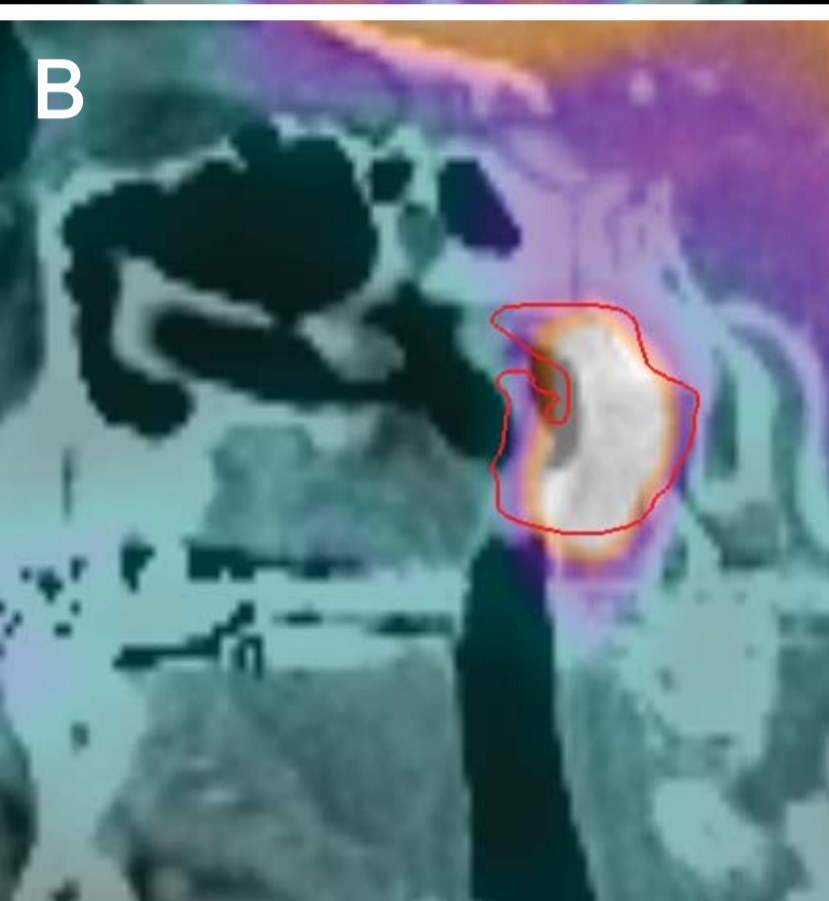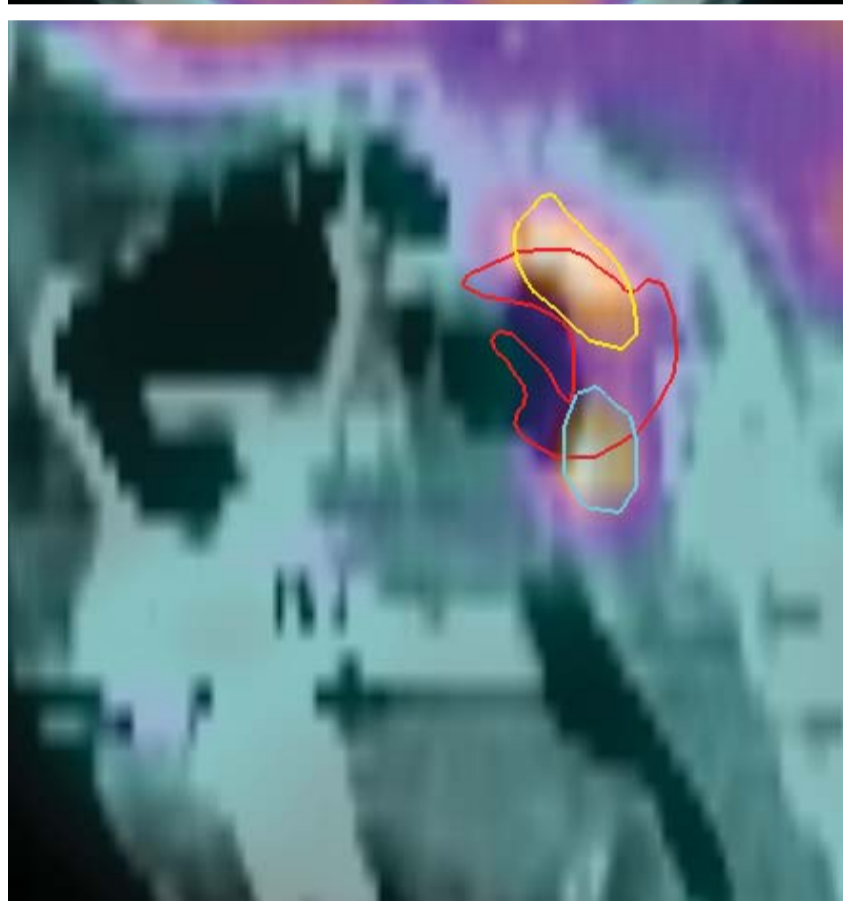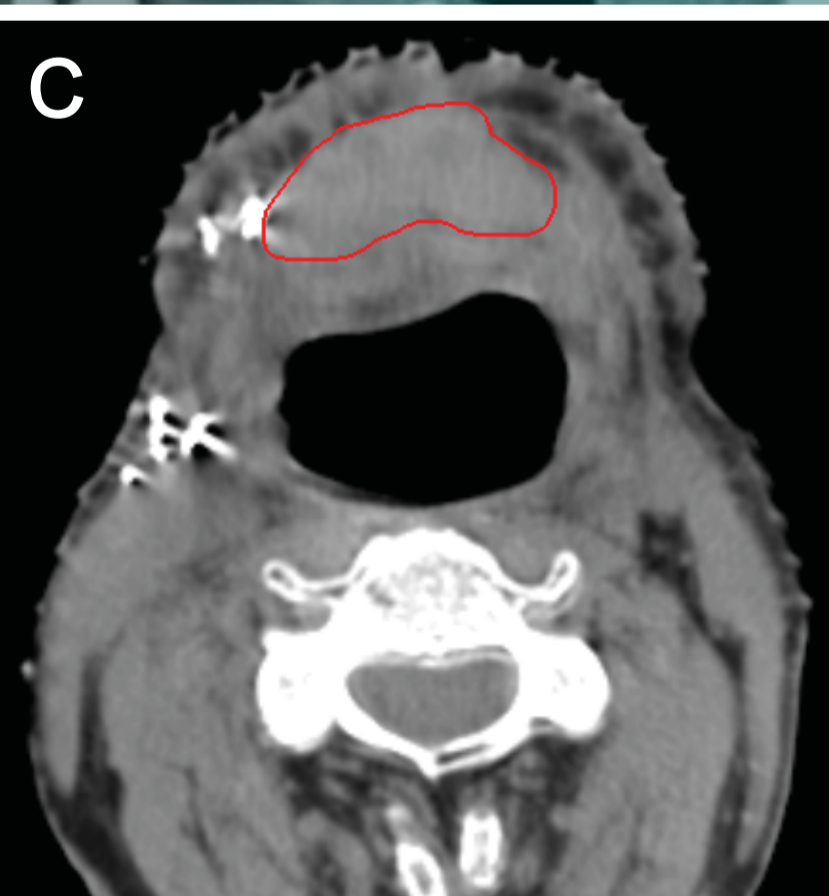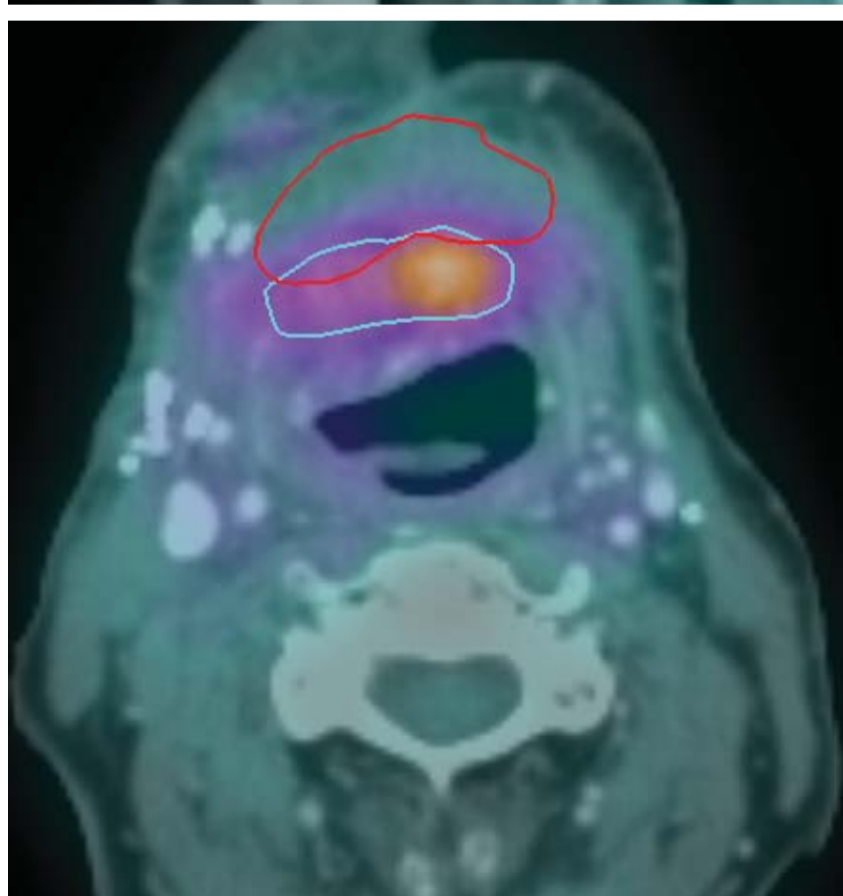

**Planning Scan**

**Recurrence Scan**

Supplement: MOESM1 [file 9670232]
